# Supplementary material
Source: PubMed Central journal article supplement (PMC8486721)
Supplement: 405_2021_6960_MOESM1_ESM.pdf [file 405_2021_6960_MOESM1_ESM.pdf]

# Opettajien äänikysely

## 1. Nimi

## 2. Sähköpostiosoite

## 3. Katuosoite \*

## 4. Puhelinnumero

## TAUSTATIEDOT

### 5. Ikä \*

- 18 - 29 vuotta
- 30 - 39 vuotta
- 40 - 49 vuotta
- 50 - 59 vuotta
- 60 - 68 vuotta

### 6. Sukupuoli \*

- Nainen

Mies

Muu

**7. Onko sinulla todettu seuraavia sairauksia?**

Krooninen keuhkosairaus (esim. astma, COPD)

Allerginen nuha

Refluksitauti

**8. Onko sinulle tehty nielun tai kurkunpään leikkausta?**

**Nielu- ja kitarisaleikkauksia ei huomioida. \***

Ei

Kyllä

En osaa sanoa

**9. Jos vastasit kyllä, mikä leikkaus?**

|  |
|--|
|  |
|  |

**10. Tupakoitko?**

**(Tupakoinnilla tarkoitetaan keskimäärin yhden savukkeen polttamista päivässä vähintään vuoden ajan.) \***

En ole koskaan tupakoinut

Olen lopettanut tupakoinnin **ja** ollut yli vuoden tupakoimatta

Tupakoin edelleen **tai** olen lopettanut alle vuosi sitten

**11. Millä kouluasteella opetat pääasiassa? \***

Alakoulu

Yläkoulu

Lukio

**12. Opetatko TÄLLÄ HETKELLÄ etä- vai lähiopetuksessa? \***

Etäopetuksessa

Lähiopetuksessa

Molemmissa

**13. Ammatti \***

Luokanopettaja

Aineenopettaja

**14. Jatkokysymys aineenopettajille: Pääasiallinen opetettava aine?**

Äidinkieli ja kielet

Reaaliaineet

Matemaattiset aineet

Taide- ja taitoaineet

**15. Kuinka monta vuotta olet toiminut opettajana?**

**Laske kuluva vuosi yhdeksi vuodeksi. \***

**16. Missä maakunnassa työskentelet? \***

Ahvenanmaa

Keski-Suomi

Pohjois-Savo

Etelä-Karjala

Kymenlaakso

Päijät-Häme

Etelä-Pohjanmaa

Lappi

Satakunta

- |                                       |                                         |                                       |
|---------------------------------------|-----------------------------------------|---------------------------------------|
| <input type="radio"/> Etelä-Savo      | <input type="radio"/> Pirkanmaa         | <input type="radio"/> Uusimaa         |
| <input type="radio"/> Kainuu          | <input type="radio"/> Pohjanmaa         | <input type="radio"/> Varsinais-Suomi |
| <input type="radio"/> Kanta-Häme      | <input type="radio"/> Pohjois-Karjala   |                                       |
| <input type="radio"/> Keski-Pohjanmaa | <input type="radio"/> Pohjois-Pohjanmaa |                                       |

**Seuraavassa kysytään tilannetta ENNEN etäopetusjaksoa.**

**17. Kuinka monta oppituntia (45 min) keskimäärin puhuit työpäivän aikana ennen etäopetusjaksoa? \***

- 0
- 1 - 2
- 3 - 4
- 5 - 6
- 7 tai enemmän

**18. Oliko sinulla ääniongelmia ennen etäopetusjaksoa? \***

- Ei
- Viikottain
- Harvemmin
- Ei lainkaan
- En osaa sanoa

Seuraavilla väittämillä monet ihmiset ovat kuvailleet omaa ääntään ja sen vaikutuksia elämäänsä. Valitse vastaus, joka kertoo kuinka usein sinusta tuntuu samalta.

Arvioi ääntäsi **ennen** etäopetusjaksoa.

**19. Ääneni vuoksi ihmisten on vaikea kuulla minua. \***

- Ei koskaan
- Ei juuri koskaan
- Joskus
- Melkein aina
- Aina

**20. Ihmisten on vaikeaa ymmärtää mitä sanon meluisassa huoneessa. \***

- Ei koskaan
- Ei juuri koskaan
- Joskus
- Melkein aina
- Aina

**21. Ääniongelmat rajoittavat henkilökohtaista ja sosiaalista elämäni. \***

- Ei koskaan
- Ei juuri koskaan
- Joskus
- Melkein aina
- Aina

**22. Tunnen jääväni keskustelujen ulkopuolelle ääneni vuoksi. \***

- Ei koskaan
- Ei juuri koskaan
- Joskus
- Melkein aina
- Aina

**23. Ääniongelman vuoksi menetän tuloja. \***

- Ei koskaan
- Ei juuri koskaan
- Joskus
- Melkein aina
- Aina

**24. Minusta tuntuu, että joudun ponnistelemaan tuottaakseni ääntä. \***

- Ei koskaan
- Ei juuri koskaan
- Joskus
- Melkein aina
- Aina

**25. Ääneni selkeyttä on vaikea ennustaa. \***

- Ei koskaan
- Ei juuri koskaan
- Joskus
- Melkein aina
- Aina

**26. Ääniongelmani hermostuttaa minua. \***

- Ei koskaan
- Ei juuri koskaan
- Joskus
- Melkein aina

Aina

**27. Ääneni aiheuttaa minulle huomattavan haitan. \***

- Ei koskaan  
 Ei juuri koskaan  
 Joskus  
 Melkein aina  
 Aina

**28. Ihmiset kysyvät: "Mikä ääntäsi vaivaa?". \***

- Ei koskaan  
 Ei juuri koskaan  
 Joskus  
 Melkein aina  
 Aina

**29. Arvioi vielä, haittasivatko seuraavat asiat sinua ennen etäopetusjaksoa? \***

|                                     | Ei<br>lainkaan        | Vain<br>vähän         | Jonkin<br>verran      | Melko<br>paljon       | Erittäin<br>paljon    |
|-------------------------------------|-----------------------|-----------------------|-----------------------|-----------------------|-----------------------|
| Melu                                | <input type="radio"/> | <input type="radio"/> | <input type="radio"/> | <input type="radio"/> | <input type="radio"/> |
| Tekniset haasteet                   | <input type="radio"/> | <input type="radio"/> | <input type="radio"/> | <input type="radio"/> | <input type="radio"/> |
| Huono sisäilma                      | <input type="radio"/> | <input type="radio"/> | <input type="radio"/> | <input type="radio"/> | <input type="radio"/> |
| Huono työergonomia (esim. työpöytä) | <input type="radio"/> | <input type="radio"/> | <input type="radio"/> | <input type="radio"/> | <input type="radio"/> |

**30. Koitko akustiset olosuhteet ennen etäopetusjaksoa (koulussa) työhösi sopiviksi? \***

Kyllä

- Ei
- En osaa sanoa

**31. Käytitkö äänenvahvistinta ennen etäopetusjaksoa (koulussa)? \***

- En käyttänyt
- Käytin

Stressillä tarkoitetaan tilannetta, jossa ihminen tuntee itsensä jännittyneeksi, levottomaksi, hermostuneeksi tai ahdistuneeksi taikka hänen on vaikea nukkua asioiden vaivatessa jatkuvasti mieltä.

**32. Tunsitko ennen etäopetusjaksoa tällaista stressiä? \***

- En lainkaan
- Vain vähän
- Jonkin verran
- Melko paljon
- Erittäin paljon

**33. Oletetaan, että työkykysi on parhaimmillaan saanut 10 pistettä. Minkä pistemäärän antaisit työkyvyillesi ennen etätyöjaksoa? 0 tarkoittaa sitä, ettet olisi pystynyt lainkaan työhön. \***

|                       |                       |                       |                       |                       |                       |                       |                       |                       |                       |                       |
|-----------------------|-----------------------|-----------------------|-----------------------|-----------------------|-----------------------|-----------------------|-----------------------|-----------------------|-----------------------|-----------------------|
| 0                     | 1                     | 2                     | 3                     | 4                     | 5                     | 6                     | 7                     | 8                     | 9                     | 10                    |
| <input type="radio"/> | <input type="radio"/> | <input type="radio"/> | <input type="radio"/> | <input type="radio"/> | <input type="radio"/> | <input type="radio"/> | <input type="radio"/> | <input type="radio"/> | <input type="radio"/> | <input type="radio"/> |

**Seuraavassa kysytään tilannetta etäopetusjakson AIKANA.**

**34. Kuinka monta oppituntia (45 min) keskimäärin puhut/puhuit työpäivässä etäopetusjakson aikana? \***

- 0
- 1 - 2



- 3 - 4
- 5 - 6
- 7 tai enemmän

**35. Onko/oliko sinulla ääniongelmia etäopetusjakson aikana? \***

- Ei
- Viikottain
- Harvemmin
- Ei lainkaan
- En osaa sanoa

**36. Jos vastasit kyllä: Kuinka usein sinulla on/oli ääniongelmia?**

- Päivittäin
- Viikottain
- Harvemmin

Seuraavilla väittämillä monet ihmiset ovat kuvailleet omaa ääntään ja sen vaikutuksia elämäänsä. Valitse vastaus, joka kertoo kuinka usein sinusta tuntuu samalta.

Arvioi ääntäsi etäopetuksen **aikana**.

**37. Ääneni vuoksi ihmisten on vaikea kuulla minua. \***

- Ei koskaan
- Ei juuri koskaan
- Joskus
- Melkein aina
- Aina

**38. Ihmisten on vaikeaa ymmärtää mitä sanon meluisassa huoneessa. \***

- Ei koskaan
- Ei juuri koskaan
- Joskus
- Melkein aina
- Aina

**39. Ääniongelmat rajoittavat henkilökohtaista ja sosiaalista elämääni. \***

- Ei koskaan
- Ei juuri koskaan
- Joskus
- Melkein aina
- Aina

**40. Tunnen jääväni keskustelujen ulkopuolelle ääneni vuoksi. \***

- Ei koskaan
- Ei juuri koskaan
- Joskus
- Melkein aina
- Aina

**41. Ääniongelman vuoksi menetän tuloja. \***

- Ei koskaan
- Ei juuri koskaan
- Joskus
- Melkein aina

Aina

**42. Minusta tuntuu, että joudun ponnistelemaan tuottaakseni ääntä. \***

- Ei koskaan
- Ei juuri koskaan
- Joskus
- Melkein aina
- Aina

**43. Ääneni selkeyttä on vaikea ennustaa. \***

- Ei koskaan
- Ei juuri koskaan
- Joskus
- Melkein aina
- Aina

**44. Ääniongelmani hermostuttaa minua. \***

- Ei koskaan
- Ei juuri koskaan
- Joskus
- Melkein aina
- Aina

**45. Ääneni aiheuttaa minulle huomattavan haitan. \***

- Ei koskaan
- Ei juuri koskaan

- Joskus
- Melkein aina
- Aina

**46. Ihmiset kysyvät: "Mikä ääntäsi vaivaa?". \***

- Ei koskaan
- Ei juuri koskaan
- Joskus
- Melkein aina
- Aina

**47. Arvioi vielä, haittaavatko/haittasivatko seuraavat asiat sinua etäopetusjakson aikana? \***

|                                             | Ei<br>lainkaan        | Vain<br>vähän         | Jonkin<br>verran      | Melko<br>paljon       | Erittäin<br>paljon    |
|---------------------------------------------|-----------------------|-----------------------|-----------------------|-----------------------|-----------------------|
| Melu                                        | <input type="radio"/> | <input type="radio"/> | <input type="radio"/> | <input type="radio"/> | <input type="radio"/> |
| Tekniset haasteet                           | <input type="radio"/> | <input type="radio"/> | <input type="radio"/> | <input type="radio"/> | <input type="radio"/> |
| Huono sisäilma                              | <input type="radio"/> | <input type="radio"/> | <input type="radio"/> | <input type="radio"/> | <input type="radio"/> |
| Huono työergonomia (esim. työpöytä<br>yms.) | <input type="radio"/> | <input type="radio"/> | <input type="radio"/> | <input type="radio"/> | <input type="radio"/> |

**48. Koitko akustiset olosuhteet etäopetuksen aikana työhösi sopiviksi? \***

- Kyllä
- Ei
- En osaa sanoa

**49. Käytätkö/käytitkö etäopetuksen aikana lisävarusteena \***

- Korvakuulokkeita + mikrofonia (headset)



**53. Vertaa lopuksi työmäärääsi etä- ja lähiopetuksen välillä. \***

- Lähiopetuksessa enemmän työtä
- Etäopetuksessa enemmän työtä
- Yhtä paljon työtä
- En osaa sanoa

Kiitos vastauksistasi!

Painamalla "Lähetä" ohjautut suomi.fi-sivuston tunnistautumispalveluun.
