# Supplementary material
Source: PubMed Central journal article supplement (PMC8486721)
Supplement: 405_2021_6960_MOESM2_ESM.pdf [file 405_2021_6960_MOESM2_ESM.pdf]

# Teacher voice survey

1. Name

2. e-mail

3. Street address \*

4. Telephone number

## BACKGROUND DATA

5. Age \*

- 18 - 29 years
- 30 - 39 years
- 40 - 49 years
- 50 - 59 years
- 60 - 68 years

6. Gender \*

- Female

- Male
- Other

**7. Have you been diagnosed with following diseases?**

- Chronic pulmonary disease (asthma, COPD)
- Allergic rhinitis
- Reflux disease

**8. Have you had previously pharyngeal or laryngeal surgery, except tonsillotomy or adenotomy?**

\*

- No
- Yes
- I don't know

**9. If you responded yes, which operation?**

|  |
|--|
|  |
|  |

**10. Do you smoke?**

**(at least one cigarette a day for at least one year) \***

- I have never been smoking
- I have ceased smoking **and** I have been non-smoker for at least one year
- I am still smoking **or** I have been non-smoker less than one year ago

**11. At what school level do you mainly teach? \***

- Primary school
- Secondary school

Senior high school

**12. Are you CURRENTLY teaching in distance or regular teaching? \***

Distance teaching

Regular teaching

Both

**13. Occupation \***

Class teacher

Subject teacher

**14. Follow-up question for subject teachers: Main subject to be taught?**

Finnish and languages

Humanities and natural sciences

Mathematical subjects

Art and physical education

**15. How many years have you been a teacher? Calculate the current year for one year. \***

**16. In which province do you work? \***

Ahvenanmaa

Keski-Suomi

Pohjois-Savo

Etelä-Karjala

Kymenlaakso

Päijät-Häme

Etelä-Pohjanmaa

Lappi

Satakunta

Etelä-Savo

Pirkanmaa

Uusimaa

- |                                       |                                         |                                       |
|---------------------------------------|-----------------------------------------|---------------------------------------|
| <input type="radio"/> Kainuu          | <input type="radio"/> Pohjanmaa         | <input type="radio"/> Varsinais-Suomi |
| <input type="radio"/> Kanta-Häme      | <input type="radio"/> Pohjois-Karjala   |                                       |
| <input type="radio"/> Keski-Pohjanmaa | <input type="radio"/> Pohjois-Pohjanmaa |                                       |

**The following will be asked about the situation BEFORE the distance learning session.**

**17. How many lessons (45 min) on average did you speak during the work day before distance learning period? \***

- 0
- 1 - 2
- 3 - 4
- 5 - 6
- 7 or more

**18. Did you experience any vocal problems before distance teaching? \***

- No
- Weekly
- Rarely
- Not at all
- I do not know

These are statements that many people have used to describe their voices and the effects of their voices on their lives. Choose the response that indicates how frequently you have the same experience.

Evaluate your voice how it was **before** the distance learning session.

**19. My voice makes it difficult for people to hear me. \***

- Never
- Almost never
- Sometimes
- Almost always
- Always

**20. People have difficulty understanding me in a noisy room. \***

- Never
- Almost never
- Sometimes
- Almost always
- Always

**21. I am less outgoing because of my voice problem. \***

- Never
- Almost never
- Sometimes
- Almost always
- Always

**22. I feel left out of conversation because of my voice. \***

- Never
- Almost never
- Sometimes
- Almost always
- Always

**23. My voice problem causes me to lose income. \***

- Never
- Almost never
- Sometimes
- Almost always
- Always

**24. I feel as though I have to strain to produce voice. \***

- Never
- Almost never
- Sometimes
- Almost always
- Always

**25. The sound of my voice varies throughout the day. \***

- Never
- Almost never
- Sometimes
- Almost always
- Always

**26. My voice problem upsets me. \***

- Never
- Almost never
- Sometimes
- Almost always

Always

**27. My voice makes me feel handicapped. \***

- Never
- Almost never
- Sometimes
- Almost always
- Always

**28. People ask, "What's wrong with your voice?". \***

- Never
- Almost never
- Sometimes
- Almost always
- Always

**29. Assess whether the following factors disturbed you at school? \***

|                                        | Not at all            | Only little           | Somehow               | Rather much           | Very much             |
|----------------------------------------|-----------------------|-----------------------|-----------------------|-----------------------|-----------------------|
| Noise                                  | <input type="radio"/> | <input type="radio"/> | <input type="radio"/> | <input type="radio"/> | <input type="radio"/> |
| Technical challenges                   | <input type="radio"/> | <input type="radio"/> | <input type="radio"/> | <input type="radio"/> | <input type="radio"/> |
| Poor indoor air quality                | <input type="radio"/> | <input type="radio"/> | <input type="radio"/> | <input type="radio"/> | <input type="radio"/> |
| Poor working ergonomics (e.g. worktop) | <input type="radio"/> | <input type="radio"/> | <input type="radio"/> | <input type="radio"/> | <input type="radio"/> |

**30. Did the acoustic conditions at school suit your work? \***

- Yes
- No

I do not know

**31. Did you use a voice amplifier at school? \***

No

Yes

Stress refers to a situation where a person feels tense, restless, nervous or anxious or having difficulty sleeping when things are constantly bothering the mind.

**32. Did you experience this kind of stress at school? \***

Not at all

Only little

Some

Rather much

Very much

**33. Assume that your ability to work has got 10 points at best. What score would you give your ability to work at school? 0 means you would not have been able to work at all. \***

0      1      2      3      4      5      6      7      8      9      10

                                      

**The following will be asked about the situation DURING the distance learning session.**

**34. How many lessons (45 min) on average did you speak during the work day during distance learning period? \***

0

1 - 2



- 3 - 4
- 5 - 6
- 7 or more

**35. Did you experience any vocal problems during distance teaching? \***

- No
- Weekly
- Rarely
- Not at all
- I do not know

**36. If you responded yes, how often did you experience vocal problems?**

- Daily
- Weekly
- Rarely

These are statements that many people have used to describe their voices and the effects of their voices on their lives. Choose the response that indicates how frequently you have the same experience.

Evaluate your voice how it was **during** the distance learning session.

**37. My voice makes it difficult for people to hear me. \***

- Never
- Almost never
- Sometimes
- Almost always
- Always

**38. People have difficulty understanding me in a noisy room. \***

- Never
- Almost never
- Sometimes
- Almost always
- Always

**39. I am less outgoing because of my voice problem. \***

- Never
- Almost never
- Sometimes
- Almost always
- Always

**40. I feel left out of conversation because of my voice. \***

- Never
- Almost never
- Sometimes
- Almost always
- Always

**41. My voice problem causes me to lose income. \***

- Never
- Almost never
- Sometimes
- Almost always

Always

**42. I feel as though I have to strain to produce voice. \***

Never

Almost never

Sometimes

Almost always

Always

**43. The sound of my voice varies throughout the day. \***

Never

Almost never

Sometimes

Almost always

Always

**44. My voice problem upsets me. \***

Never

Almost never

Sometimes

Almost always

Always

**45. My voice makes me feel handicapped. \***

Never

Almost never

- Sometimes
- Almost always
- Always

**46. People ask, “What’s wrong with your voice?”. \***

- Never
- Almost never
- Sometimes
- Almost always
- Always

**47. Assess whether the following factors disturbed you during distance learning session? \***

|                                        | Not at all            | Only little           | Somehow               | Rather much           | Very much             |
|----------------------------------------|-----------------------|-----------------------|-----------------------|-----------------------|-----------------------|
| Noise                                  | <input type="radio"/> | <input type="radio"/> | <input type="radio"/> | <input type="radio"/> | <input type="radio"/> |
| Technical challenges                   | <input type="radio"/> | <input type="radio"/> | <input type="radio"/> | <input type="radio"/> | <input type="radio"/> |
| Poor indoor air quality                | <input type="radio"/> | <input type="radio"/> | <input type="radio"/> | <input type="radio"/> | <input type="radio"/> |
| Poor working ergonomics (e.g. worktop) | <input type="radio"/> | <input type="radio"/> | <input type="radio"/> | <input type="radio"/> | <input type="radio"/> |

**48. Did the acoustic conditions during distance teaching suit your work? \***

- Yes
- No
- I do not know

**49. Did you use any of the following accessory during distance learning? \***

- Earphones + microphone (headset)
- Separate microphone

- Separate earphones
- Office speakerphone
- None of above

**50. If you used headset, which type? (click on the picture)**

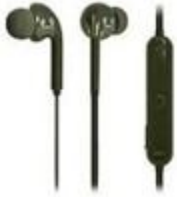

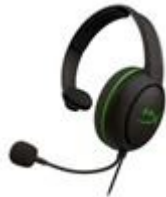

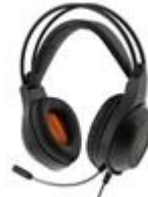

Stress refers to a situation where a person feels tense, restless, nervous or anxious or having difficulty sleeping when things are constantly bothering the mind.

**51. Did you feel this kind of stress during distance teaching? \***

- Not at all
- Only little
- Some
- Rather much
- Very much

**52. Assume that your ability to work has got 10 points at best. What score would you give your ability to work during distance teaching? 0 means you would not have been able to work at all. \***

|                       |                       |                       |                       |                       |                       |                       |                       |                       |                       |                       |
|-----------------------|-----------------------|-----------------------|-----------------------|-----------------------|-----------------------|-----------------------|-----------------------|-----------------------|-----------------------|-----------------------|
| 0                     | 1                     | 2                     | 3                     | 4                     | 5                     | 6                     | 7                     | 8                     | 9                     | 10                    |
| <input type="radio"/> | <input type="radio"/> | <input type="radio"/> | <input type="radio"/> | <input type="radio"/> | <input type="radio"/> | <input type="radio"/> | <input type="radio"/> | <input type="radio"/> | <input type="radio"/> | <input type="radio"/> |

**53. Finally, compare your workload between distance and regular teaching \***

- More work in regular teaching
- More work in distance teaching
- Just as much work in both
- I do not know

Thank you for your responses!

By pressing "Send", you are directed to the authentication service of the suomi.fi website.
